# Supplementary material for: MetaWorm: An Integrative Data-Driven Model Simulating C. elegans Brain, Body and Environment Interactions
Source: Research Square preprint supplement (doi:10.21203/rs.3.rs-4065976/v1), 2024-04-04
Supplement: Supplementary file 1 [file 69d285f4090d59b5afa36064.docx]

**Supplementary Materials**

**Table S1. Ion Channel Models**

| **Ion Channel** | **Dynamic Model** |
| --- | --- |
| **SHL1** |  |
| **KVS1** |  |
| **SHK1** |  |
| **KQT3** |  |
| **EGL2** |  |
| **EGL36** |  |
| **IRK** |  |
| **EGL19** |  |
| **UNC2** |  |
| **CCA1** |  |
| **SLO1_UNC2** |  |
| **SLO1_EGL19** |  |
| **SLO2_UNC2** |  |
| **SLO2_EGL19** |  |
| **KCNL** |  |
| **NCA** |  |

**Table S2. Ion Channel Model Parameters**

| **Ion Channel** | **Function** | **Parameter** | **Value** | **Unit** |
| --- | --- | --- | --- | --- |
| **SHL1** | *m∞* | *V*0.5 | 11 | mV |
| *ka* | 14.1 | mV |
| *h∞* | *V*0.5 | -33.1 | mV |
| *ki* | 8.3 | mV |
| *τm* | a | 13.8 | ms |
| b | -17.5 | mV |
| c | 12.9 | mV |
| d | -3.7 | mV |
| e | 6.5 | mV |
| f | 1.9 | ms |
| *τhf* | a | 539.2 | ms |
| b | -28.2 | mV |
| c | 4.9 | mV |
| d | 27.3 | ms |
| *τhs* | a | 8422 | ms |
| b | -37.7 | mV |
| c | 6.4 | mV |
| d | 118.9 | ms |
| **SHK1** | *m∞* | *V*0.5 | 20.4 | mV |
| *ka* | 7.7 | mV |
| *h∞* | *V*0.5 | -7 | mV |
| *ki* | 5.8 | mV |
| *τm* | a | 26.6 | ms |
| b | -33.7 | mV |
| c | 15.8 | mV |
| d | -33.7 | mV |
| e | 15.4 | mV |
| f | 2 | ms |
| *τh* | a | 1400 | ms |
| **KVS1** | *m∞* | *V*0.5 | 57.1 | mV |
| *ka* | 25 | mV |
| *h∞* | *V*0.5 | 47 | mV |
| *ki* | 11.1 | mV |
| *τm* | a | 30 | ms |
| b | 18.1 | mV |
| c | 20 | mV |
| d | 1 | ms |
| *τhf* | a | 88.5 | ms |
| b | 50 | mV |
| c | -15 | mV |
| d | 53.4 | ms |
| **KQT3** | *m∞* | *V*0.5 | -12.6726 | mV |
| *ka* | 15.8008 | mV |
| *w∞* | *V*0.5 | -1.084 | mV |
| *ki* | 28.78 | mV |
| a | 0.49 |  |
| b | 0.51 |  |
| *s∞* | *V*0.5 | -45.3 | mV |
| *ki* | 12.3 | mV |
| a | 0.34 |  |
| b | 0.66 |  |
| *τmf* | a | 395.3 | ms |
| b | 38.1 | mV |
| c | 33.59 | mV |
| *τms* | a | 5503 | ms |
| b | -5345.4 | ms |
| c | 0.02827 | mV-1 |
| d | -23.9 | mV |
| e | 4590.6 | ms |
| f | 0.0357 | mV-1 |
| g | 14.15 | mV |
| *τw* | a | 0.544 | ms |
| b | 29.2 | ms |
| c | -48.09 | mV |
| d | 48.83 | mV |
| *τs* | a | 500000 | ms |
| **EGL2** | *m∞* | *V*0.5 | -6.9 | mV |
| *ka* | 14.9 | mV |
| *τm* | a | 1845.8 | ms |
| b | -122.6 | mV |
| c | -13.8 | mV |
| d | 1517.74 | ms |
| **EGL36** | *m∞* | *V*0.5 | 63 | mV |
| *ka* | 28.5 | mV |
| *τms* | a | 355 | ms |
| *τmm* | a | 63 | ms |
| *τmf* | a | 13 | ms |
| **IRK** | *m∞* | *V*0.5 | -82 | mV |
| *ka* | 13 | mV |
| *τm* | a | 17.1 | ms |
| b | -17.8 | mV |
| c | 20.3 | mV |
| d | -43.4 | mV |
| e | 11.2 | mV |
| f | 3.8 | ms |
| **EGL19** | *m∞* | *V*0.5 | 5.6 | mV |
| *ka* | 7.5 | mV |
| *h∞* | *V*0.5 | 24.9 | mV |
| *ki* | 12 | mV |
| *V*0.5*b* | -20.5 | mV |
| *ki b* | 8.1 | mV |
| a | 1.43 |  |
| b | 0.14 |  |
| c | 5.96 |  |
| d | 0.6 |  |
| *τm* | a | 2.9 | ms |
| b | 5.2 | mV |
| c | 6 | mV |
| d | 1.9 | ms |
| e | 1.4 | mV |
| f | 30 | mV |
| g | 2.3 | ms |
| *τh* | a | 0.4 |  |
| b | 44.6 | ms |
| c | -23 | mV |
| d | 5 | mV |
| e | 36.4 | ms |
| f | 28.7 | mV |
| g | 3.7 | mV |
| h | 43.1 | ms |
| **UNC2** | *m∞* | *V*0.5 | -12.2 | mV |
| *ka* | 4 | mV |
| *h∞* | *V*0.5 | -52.5 | mV |
| *ki* | 5.6 | mV |
| *τm* | a | 1.5 | ms |
| b | -8.2 | mV |
| c | 9.1 | mV |
| d | 15.4 | mV |
| e | 0.1 | ms |
| *τh* | a | 83.8 | ms |
| b | 52.9 | mV |
| c | -3.5 | mV |
| d | 72.1 | ms |
| e | 23.9 | mV |
| f | -3.6 | mV |
| **CCA1** | *m∞* | *V*0.5 | -43.32 | mV |
| *ka* | 7.6 | mV |
| *h∞* | *V*0.5 | -58 | mV |
| *ki* | 7 | mV |
| *τm* | a | 40 | ms |
| b | -62.5 | mV |
| c | -12.6 | mV |
| d | 0.7 | ms |
| *τh* | a | 280 | ms |
| b | -60.7 | mV |
| c | 8.5 | mV |
| d | 19.8 | ms |
| **SLO1** | *wyx* |  | 0.013 | mV-1 |
| *wxy* |  | -0.028 | mV-1 |
| *w0-* |  | 3.15 | ms-1 |
| *w0+* |  | 0.16 | ms-1 |
| *Kxy* |  | 55.73 | *μ*M/*μ*m3 |
| *nxy* |  | 1.3 |  |
| *Kyx* |  | 34.34 | *μ*M/*μ*m3 |
| *nyx* |  | 10*−*4 |  |
| **SLO2** | *wyx* |  | 0.019 | mV-1 |
| *wxy* |  | -0.024 | mV-1 |
| *w0-* |  | 0.9 | ms-1 |
| *w0+* |  | 0.027 | ms-1 |
| *Kxy* |  | 93.45 | *μ*M/*μ*m3 |
| *nxy* |  | 1.84 |  |
| *Kyx* |  | 3294.55 | *μ*M/*μ*m3 |
| *nyx* |  | 10*−*5 |  |
| **KCNL** | *KCa* |  | 0.33 | *µ*M |
| *τm* | a | 6.3 | ms |
| **Intracellular calcium calculation** | *gsc* |  | 40 | pS |
| *VCa* |  | 60 | mV |
| *r* |  | 13 | nm |
| *F* |  | 96485 | C mol-1 |
| *DCa* |  | 250 | µm2/s |
| *kB+* |  | 500 | *µ*M-1 s-1 |
| [*B*]tot |  | 30 | *µ*M |
| [Ca2+]*c,in* |  | 0.05 | *µ*M |
| *V*cell |  | 31.63 | *µ*m3 |
| *f* |  | 0.001 |  |
| *τCa* |  | 50 | ms |
| [Ca2+]*eqm* |  | 0.05 | *μ*M/*μ*m2 |

**Table S3. Neuron Model Parameters**

| **Parameters** | **AWC** | **AIY** | **RIM** | **VD5** | **AVA** |
| --- | --- | --- | --- | --- | --- |
| *(Ω·cm)* | 380 | 269 | 344 | 221 | 150 |
| *(μF/cm2)* | 2 | 7 | 4 | 2 | 8 |
| *(S/cm2)* | 0.00003 | 0.000014 | 0.000077 | 0.00005 | 0.00007 |
| *(kΩ·cm2)* | 33.3 | 71.4 | 13 | 20 | 14.3 |
| *(mV)* | -65 | -54.5 | -33 | -75 | -33 |
| *(nS/μm2)* | 0.0026 | 0.001 | 0.001 | 0.001 | 0.0004 |
| *(nS/μm2)* | 0 | 0.00047 | 0.00015 | 0.0055 | 0.001 |
| *(nS/μm2)* | 0 | 0.0005 | 0.0001 | 0 | 0 |
| *(nS/μm2)* | 0 | 0.001 | 0.00001 | 0.001 | 0 |
| *(nS/μm2)* | 0 | 0.00049 | 0.0012 | 0.0046 | 0 |
| *(nS/μm2)* | 0.022 | 0.0005 | 0.00005 | 0.00016 | 0 |
| *(nS/μm2)* | 0.006 | 0.0001 | 0 | 0.0001 | 0.002 |
| *(nS/μm2)* | 0.001 | 0 | 0 | 0 | 0.0001 |
| *(nS/μm2)* | 0 | 0.00017 | 0 | 0.0015 | 0.0006 |
| *(nS/μm2))* | 0 | 0.00028 | 0.000013 | 0 | 0 |
| *(nS/μm2)* | 0 | 0.000174 | 0.009 | 0.004 | 0.06 |
| *(nS/μm2)* | 0 | 0.0015 | 0.00067 | 0.0013 | 0 |
| *(nS/μm2)* | 0 | 0.0022 | 0 | 0.0006 | 0 |
| *(nS/μm2)* | 0 | 0.00063 | 0 | 0 | 0.005 |
| *(nS/μm2)* | 0 | 0.000085 | 0 | 0.00015 | 0.0007 |
| *(nS/μm2)* | 0 | 0.0011 | 0.00105 | 0 | 0 |

**Table S4. 302 Neurons and Functional Groups**

| **Index** | **Neuron** | **Functional Group** | **Parameter Reference** |
| --- | --- | --- | --- |
| 1 | I1L | interneuron | AIY |
| 2 | I1R | interneuron | AIY |
| 3 | I2L | interneuron | AIY |
| 4 | I2R | interneuron | AIY |
| 5 | I3 | interneuron | AIY |
| 6 | I4 | interneuron | AIY |
| 7 | I5 | interneuron | AIY |
| 8 | I6 | interneuron | AIY |
| 9 | M1 | body motor neuron | VD5 |
| 10 | M2L | body motor neuron | VD5 |
| 11 | M2R | body motor neuron | VD5 |
| 12 | M3L | body motor neuron | VD5 |
| 13 | M3R | body motor neuron | VD5 |
| 14 | M4 | body motor neuron | VD5 |
| 15 | M5 | body motor neuron | VD5 |
| 16 | MCL | body motor neuron | VD5 |
| 17 | MCR | body motor neuron | VD5 |
| 18 | MI | body motor neuron | VD5 |
| 19 | NSML | interneuron | AIY |
| 20 | NSMR | interneuron | AIY |
| 21 | ASIL | sensory neuron | AWC |
| 22 | ASIR | sensory neuron | AWC |
| 23 | ASJL | sensory neuron | AWC |
| 24 | ASJR | sensory neuron | AWC |
| 25 | AWAL | sensory neuron | AWC |
| 26 | AWAR | sensory neuron | AWC |
| 27 | ASGL | sensory neuron | AWC |
| 28 | ASGR | sensory neuron | AWC |
| 29 | AWBL | sensory neuron | AWC |
| 30 | AWBR | sensory neuron | AWC |
| 31 | ASEL | sensory neuron | AWC |
| 32 | ASER | sensory neuron | AWC |
| 33 | ADFL | sensory neuron | AWC |
| 34 | ADFR | sensory neuron | AWC |
| 35 | AFDL | sensory neuron | AWC |
| 36 | AFDR | sensory neuron | AWC |
| 37 | AWCL | sensory neuron | AWC |
| 38 | AWCR | sensory neuron | AWC |
| 39 | ASKL | sensory neuron | AWC |
| 40 | ASKR | sensory neuron | AWC |
| 41 | ASHL | sensory neuron | AWC |
| 42 | ASHR | sensory neuron | AWC |
| 43 | ADLL | sensory neuron | AWC |
| 44 | ADLR | sensory neuron | AWC |
| 45 | BAGL | sensory neuron | AWC |
| 46 | BAGR | sensory neuron | AWC |
| 47 | URXL | sensory neuron | AWC |
| 48 | URXR | sensory neuron | AWC |
| 49 | ALNL | sensory neuron | AWC |
| 50 | ALNR | sensory neuron | AWC |
| 51 | PLNL | sensory neuron | AWC |
| 52 | PLNR | sensory neuron | AWC |
| 53 | SDQL | sensory neuron | AWC |
| 54 | SDQR | sensory neuron | AWC |
| 55 | AQR | sensory neuron | AWC |
| 56 | PQR | sensory neuron | AWC |
| 57 | ALML | sensory neuron | AWC |
| 58 | ALMR | sensory neuron | AWC |
| 59 | AVM | sensory neuron | AWC |
| 60 | PVM | sensory neuron | AWC |
| 61 | PLML | sensory neuron | AWC |
| 62 | PLMR | sensory neuron | AWC |
| 63 | FLPL | sensory neuron | AWC |
| 64 | FLPR | sensory neuron | AWC |
| 65 | DVA | interneuron | AIY |
| 66 | PVDL | sensory neuron | AWC |
| 67 | PVDR | sensory neuron | AWC |
| 68 | ADEL | sensory neuron | AWC |
| 69 | ADER | sensory neuron | AWC |
| 70 | PDEL | sensory neuron | AWC |
| 71 | PDER | sensory neuron | AWC |
| 72 | PHAL | sensory neuron | AWC |
| 73 | PHAR | sensory neuron | AWC |
| 74 | PHBL | sensory neuron | AWC |
| 75 | PHBR | sensory neuron | AWC |
| 76 | PHCL | sensory neuron | AWC |
| 77 | PHCR | sensory neuron | AWC |
| 78 | IL2DL | sensory neuron | AWC |
| 79 | IL2DR | sensory neuron | AWC |
| 80 | IL2L | sensory neuron | AWC |
| 81 | IL2R | sensory neuron | AWC |
| 82 | IL2VL | sensory neuron | AWC |
| 83 | IL2VR | sensory neuron | AWC |
| 84 | CEPDL | sensory neuron | AWC |
| 85 | CEPDR | sensory neuron | AWC |
| 86 | CEPVL | sensory neuron | AWC |
| 87 | CEPVR | sensory neuron | AWC |
| 88 | URYDL | sensory neuron | AWC |
| 89 | URYDR | sensory neuron | AWC |
| 90 | URYVL | sensory neuron | AWC |
| 91 | URYVR | sensory neuron | AWC |
| 92 | OLLL | sensory neuron | AWC |
| 93 | OLLR | sensory neuron | AWC |
| 94 | OLQDL | sensory neuron | AWC |
| 95 | OLQDR | sensory neuron | AWC |
| 96 | OLQVL | sensory neuron | AWC |
| 97 | OLQVR | sensory neuron | AWC |
| 98 | IL1DL | sensory neuron | AWC |
| 99 | IL1DR | sensory neuron | AWC |
| 100 | IL1L | sensory neuron | AWC |
| 101 | IL1R | sensory neuron | AWC |
| 102 | IL1VL | sensory neuron | AWC |
| 103 | IL1VR | sensory neuron | AWC |
| 104 | AINL | interneuron | AIY |
| 105 | AINR | interneuron | AIY |
| 106 | AIML | interneuron | AIY |
| 107 | AIMR | interneuron | AIY |
| 108 | RIH | interneuron | AIY |
| 109 | URBL | interneuron | AIY |
| 110 | URBR | interneuron | AIY |
| 111 | RIR | interneuron | AIY |
| 112 | AIYL | interneuron | AIY |
| 113 | AIYR | interneuron | AIY |
| 114 | AIAL | interneuron | AIY |
| 115 | AIAR | interneuron | AIY |
| 116 | AUAL | interneuron | AIY |
| 117 | AUAR | interneuron | AIY |
| 118 | AIZL | interneuron | AIY |
| 119 | AIZR | interneuron | AIY |
| 120 | RIS | interneuron | AIY |
| 121 | ALA | interneuron | AIY |
| 122 | PVQL | interneuron | AIY |
| 123 | PVQR | interneuron | AIY |
| 124 | ADAL | interneuron | AIY |
| 125 | ADAR | interneuron | AIY |
| 126 | RIFL | interneuron | AIY |
| 127 | RIFR | interneuron | AIY |
| 128 | BDUL | interneuron | AIY |
| 129 | BDUR | interneuron | AIY |
| 130 | PVR | interneuron | AIY |
| 131 | AVFL | interneuron | AIY |
| 132 | AVFR | interneuron | AIY |
| 133 | AVHL | interneuron | AIY |
| 134 | AVHR | interneuron | AIY |
| 135 | PVPL | interneuron | AIY |
| 136 | PVPR | interneuron | AIY |
| 137 | LUAL | interneuron | AIY |
| 138 | LUAR | interneuron | AIY |
| 139 | PVNL | interneuron | AIY |
| 140 | PVNR | interneuron | AIY |
| 141 | AVG | interneuron | AIY |
| 142 | DVB | interneuron | AIY |
| 143 | RIBL | interneuron | AIY |
| 144 | RIBR | interneuron | AIY |
| 145 | RIGL | interneuron | AIY |
| 146 | RIGR | interneuron | AIY |
| 147 | RMGL | head motor neuron | RIM |
| 148 | RMGR | head motor neuron | RIM |
| 149 | AIBL | interneuron | AIY |
| 150 | AIBR | interneuron | AIY |
| 151 | RICL | interneuron | AIY |
| 152 | RICR | interneuron | AIY |
| 153 | SAADL | interneuron | AIY |
| 154 | SAADR | interneuron | AIY |
| 155 | SAAVL | interneuron | AIY |
| 156 | SAAVR | interneuron | AIY |
| 157 | AVKL | interneuron | AIY |
| 158 | AVKR | interneuron | AIY |
| 159 | DVC | interneuron | AIY |
| 160 | AVJL | interneuron | AIY |
| 161 | AVJR | interneuron | AIY |
| 162 | PVT | interneuron | AIY |
| 163 | AVDL | interneuron | AIY |
| 164 | AVDR | interneuron | AIY |
| 165 | AVL | interneuron | AIY |
| 166 | PVWL | interneuron | AIY |
| 167 | PVWR | interneuron | AIY |
| 168 | RIAL | interneuron | AIY |
| 169 | RIAR | interneuron | AIY |
| 170 | RIML | head motor neuron | RIM |
| 171 | RIMR | head motor neuron | RIM |
| 172 | AVEL | command neuron | AVA |
| 173 | AVER | command neuron | AVA |
| 174 | RMFL | head motor neuron | RIM |
| 175 | RMFR | head motor neuron | RIM |
| 176 | RID | interneuron | AIY |
| 177 | AVBL | command neuron | AVA |
| 178 | AVBR | command neuron | AVA |
| 179 | AVAL | command neuron | AVA |
| 180 | AVAR | command neuron | AVA |
| 181 | PVCL | command neuron | AVA |
| 182 | PVCR | command neuron | AVA |
| 183 | RIPL | interneuron | AIY |
| 184 | RIPR | interneuron | AIY |
| 185 | URADL | head motor neuron | RIM |
| 186 | URADR | head motor neuron | RIM |
| 187 | URAVL | head motor neuron | RIM |
| 188 | URAVR | head motor neuron | RIM |
| 189 | RMEL | head motor neuron | RIM |
| 190 | RMER | head motor neuron | RIM |
| 191 | RMED | head motor neuron | RIM |
| 192 | RMEV | head motor neuron | RIM |
| 193 | RMDDL | head motor neuron | RIM |
| 194 | RMDDR | head motor neuron | RIM |
| 195 | RMDL | head motor neuron | RIM |
| 196 | RMDR | head motor neuron | RIM |
| 197 | RMDVL | head motor neuron | RIM |
| 198 | RMDVR | head motor neuron | RIM |
| 199 | RIVL | head motor neuron | RIM |
| 200 | RIVR | head motor neuron | RIM |
| 201 | RMHL | head motor neuron | RIM |
| 202 | RMHR | head motor neuron | RIM |
| 203 | SABD | head motor neuron | RIM |
| 204 | SABVL | head motor neuron | RIM |
| 205 | SABVR | head motor neuron | RIM |
| 206 | SMDDL | head motor neuron | RIM |
| 207 | SMDDR | head motor neuron | RIM |
| 208 | SMDVL | head motor neuron | RIM |
| 209 | SMDVR | head motor neuron | RIM |
| 210 | SMBDL | head motor neuron | RIM |
| 211 | SMBDR | head motor neuron | RIM |
| 212 | SMBVL | head motor neuron | RIM |
| 213 | SMBVR | head motor neuron | RIM |
| 214 | SIBDL | head motor neuron | RIM |
| 215 | SIBDR | head motor neuron | RIM |
| 216 | SIBVL | head motor neuron | RIM |
| 217 | SIBVR | head motor neuron | RIM |
| 218 | SIADL | head motor neuron | RIM |
| 219 | SIADR | head motor neuron | RIM |
| 220 | SIAVL | head motor neuron | RIM |
| 221 | SIAVR | head motor neuron | RIM |
| 222 | DA1 | body motor neuron | VD5 |
| 223 | DA2 | body motor neuron | VD5 |
| 224 | DA3 | body motor neuron | VD5 |
| 225 | DA4 | body motor neuron | VD5 |
| 226 | DA5 | body motor neuron | VD5 |
| 227 | DA6 | body motor neuron | VD5 |
| 228 | DA7 | body motor neuron | VD5 |
| 229 | DA8 | body motor neuron | VD5 |
| 230 | DA9 | body motor neuron | VD5 |
| 231 | PDA | body motor neuron | VD5 |
| 232 | DB1 | body motor neuron | VD5 |
| 233 | DB2 | body motor neuron | VD5 |
| 234 | DB3 | body motor neuron | VD5 |
| 235 | DB4 | body motor neuron | VD5 |
| 236 | DB5 | body motor neuron | VD5 |
| 237 | DB6 | body motor neuron | VD5 |
| 238 | DB7 | body motor neuron | VD5 |
| 239 | AS1 | body motor neuron | VD5 |
| 240 | AS2 | body motor neuron | VD5 |
| 241 | AS3 | body motor neuron | VD5 |
| 242 | AS4 | body motor neuron | VD5 |
| 243 | AS5 | body motor neuron | VD5 |
| 244 | AS6 | body motor neuron | VD5 |
| 245 | AS7 | body motor neuron | VD5 |
| 246 | AS8 | body motor neuron | VD5 |
| 247 | AS9 | body motor neuron | VD5 |
| 248 | AS10 | body motor neuron | VD5 |
| 249 | AS11 | body motor neuron | VD5 |
| 250 | PDB | body motor neuron | VD5 |
| 251 | DD1 | body motor neuron | VD5 |
| 252 | DD2 | body motor neuron | VD5 |
| 253 | DD3 | body motor neuron | VD5 |
| 254 | DD4 | body motor neuron | VD5 |
| 255 | DD5 | body motor neuron | VD5 |
| 256 | DD6 | body motor neuron | VD5 |
| 257 | VA1 | body motor neuron | VD5 |
| 258 | VA2 | body motor neuron | VD5 |
| 259 | VA3 | body motor neuron | VD5 |
| 260 | VA4 | body motor neuron | VD5 |
| 261 | VA5 | body motor neuron | VD5 |
| 262 | VA6 | body motor neuron | VD5 |
| 263 | VA7 | body motor neuron | VD5 |
| 264 | VA8 | body motor neuron | VD5 |
| 265 | VA9 | body motor neuron | VD5 |
| 266 | VA10 | body motor neuron | VD5 |
| 267 | VA11 | body motor neuron | VD5 |
| 268 | VA12 | body motor neuron | VD5 |
| 269 | VB1 | body motor neuron | VD5 |
| 270 | VB2 | body motor neuron | VD5 |
| 271 | VB3 | body motor neuron | VD5 |
| 272 | VB4 | body motor neuron | VD5 |
| 273 | VB5 | body motor neuron | VD5 |
| 274 | VB6 | body motor neuron | VD5 |
| 275 | VB7 | body motor neuron | VD5 |
| 276 | VB8 | body motor neuron | VD5 |
| 277 | VB9 | body motor neuron | VD5 |
| 278 | VB10 | body motor neuron | VD5 |
| 279 | VB11 | body motor neuron | VD5 |
| 280 | VD1 | body motor neuron | VD5 |
| 281 | VD2 | body motor neuron | VD5 |
| 282 | VD3 | body motor neuron | VD5 |
| 283 | VD4 | body motor neuron | VD5 |
| 284 | VD5 | body motor neuron | VD5 |
| 285 | VD6 | body motor neuron | VD5 |
| 286 | VD7 | body motor neuron | VD5 |
| 287 | VD8 | body motor neuron | VD5 |
| 288 | VD9 | body motor neuron | VD5 |
| 289 | VD10 | body motor neuron | VD5 |
| 290 | VD11 | body motor neuron | VD5 |
| 291 | VD12 | body motor neuron | VD5 |
| 292 | VD13 | body motor neuron | VD5 |
| 293 | CANL | interneuron | AIY |
| 294 | CANR | interneuron | AIY |
| 295 | HSNL | body motor neuron | VD5 |
| 296 | HSNR | body motor neuron | VD5 |
| 297 | VC1 | body motor neuron | VD5 |
| 298 | VC2 | body motor neuron | VD5 |
| 299 | VC3 | body motor neuron | VD5 |
| 300 | VC4 | body motor neuron | VD5 |
| 301 | VC5 | body motor neuron | VD5 |
| 302 | VC6 | body motor neuron | VD5 |

**Table S5.** **Comparisons between Sibernetic and our body & environment model**

|  |  | OpenWorm  Sibernetic | MetaWorm  body & environment |
| --- | --- | --- | --- |
| Modelling | Worm body | ~34000-104000 particles | 984 vertices,  3341 tetrahedrons |
| 3D scene scale  (Worm body length) | 1.5-10 | ~1200 |
| Real-time Simulation | Simulation time per step  (1 worm, 1 CPU core) | 0.4-2 s | 0.08-0.1 s |
| Simulation time step  (Default) | 0.00002 s | 1/240 s |
| Task & Behavior Analysis | Number of worms | One | One or more |
| Ability for  behavior analysis | No | Yes |

Siberntic is a physical simulator developed for simulations of *C. elegans* physical body dynamics within the OpenWorm Project1. Although Siberntic’s particle model has advantages in some specific tasks, such as tasks related to pressure computation, MetaWorm’s body & environment model outperforms it in many aspects, as demonstrated in Table S5. Firstly, from a modelling point of view, our tetrahedron worm body has much less elements compared to Sibernetic’s particle body2. This results in a huge performance improvement while preserving anatomical authenticity. Moreover, with simplified hydrodynamics, scale of 3D simulation scene increased two orders compared to Sibernetic. Secondly, from a simulation perspective, the utilization of projective dynamics as the deformation solver has greatly reduced the simulation time per iteration step compared to Sibernetic. Moreover, projective dynamics exhibits stability even with large time steps, enabling the use of larger steps to accelerate simulation. Finally, by combining all the above advantages, we can perform task simulations of multiple worms or even worm populations, as shown in Movie S2. From the task point of view, this increased generality and applicability of tasks. Besides, the proposed TWRCS can numerically stably quantify worm locomotion, which is very useful for behavior analysis in worm tasks.

**Table S6.** **136 Neurons Used in Simulation**

| **No.** | **Index** | **Neuron** | **Recorded in Biological Experiment3** | **Network Input/Output** |
| --- | --- | --- | --- | --- |
| 1 | 39 | ASKL | yes | input |
| 2 | 40 | ASKR | yes | input |
| 3 | 49 | ALNL | yes | input |
| 4 | 50 | ALNR | yes | input |
| 5 | 61 | PLML | yes | input |
| 6 | 65 | DVA | yes |  |
| 7 | 72 | PHAL | yes | input |
| 8 | 73 | PHAR | yes | input |
| 9 | 88 | URYDL | yes | input |
| 10 | 89 | URYDR | yes | input |
| 11 | 90 | URYVL | yes | input |
| 12 | 91 | URYVR | yes | input |
| 13 | 120 | RIS | yes |  |
| 14 | 121 | ALA | yes |  |
| 15 | 131 | AVFL | yes |  |
| 16 | 132 | AVFR | yes |  |
| 17 | 139 | PVNL | yes |  |
| 18 | 140 | PVNR | yes |  |
| 19 | 142 | DVB | yes |  |
| 20 | 143 | RIBL | yes |  |
| 21 | 144 | RIBR | yes |  |
| 22 | 149 | AIBL | yes |  |
| 23 | 150 | AIBR | yes |  |
| 24 | 159 | DVC | yes |  |
| 25 | 170 | RIML | yes | output |
| 26 | 171 | RIMR | yes | output |
| 27 | 172 | AVEL | yes |  |
| 28 | 173 | AVER | yes |  |
| 29 | 176 | RID | yes |  |
| 30 | 177 | AVBL | yes |  |
| 31 | 178 | AVBR | yes |  |
| 32 | 179 | AVAL | yes |  |
| 33 | 180 | AVAR | yes |  |
| 34 | 189 | RMEL | yes | output |
| 35 | 190 | RMER | yes | output |
| 36 | 191 | RMED | yes | output |
| 37 | 192 | RMEV | yes | output |
| 38 | 199 | RIVL | yes | output |
| 39 | 200 | RIVR | yes | output |
| 40 | 203 | SABD | yes |  |
| 41 | 204 | SABVL | yes |  |
| 42 | 205 | SABVR | yes |  |
| 43 | 206 | SMDDL | yes | output |
| 44 | 207 | SMDDR | yes | output |
| 45 | 208 | SMDVL | yes | output |
| 46 | 209 | SMDVR | yes | output |
| 47 | 218 | SIADL | yes |  |
| 48 | 219 | SIADR | yes |  |
| 49 | 220 | SIAVL | yes |  |
| 50 | 221 | SIAVR | yes |  |
| 51 | 222 | DA1 | yes | output |
| 52 | 228 | DA7 | yes | output |
| 53 | 230 | DA9 | yes | output |
| 54 | 231 | PDA | yes |  |
| 55 | 232 | DB1 | yes | output |
| 56 | 233 | DB2 | yes | output |
| 57 | 238 | DB7 | yes | output |
| 58 | 248 | AS10 | yes |  |
| 59 | 257 | VA1 | yes | output |
| 60 | 267 | VA11 | yes | output |
| 61 | 268 | VA12 | yes | output |
| 62 | 269 | VB1 | yes | output |
| 63 | 270 | VB2 | yes | output |
| 64 | 279 | VB11 | yes | output |
| 65 | 292 | VD13 | yes | output |
| 66 | 25 | AWAL | no | input |
| 67 | 26 | AWAR | no | input |
| 68 | 37 | AWCL | no | input |
| 69 | 38 | AWCR | no | input |
| 70 | 112 | AIYL | no |  |
| 71 | 113 | AIYR | no |  |
| 72 | 114 | AIAL | no |  |
| 73 | 115 | AIAR | no |  |
| 74 | 118 | AIZL | no |  |
| 75 | 119 | AIZR | no |  |
| 76 | 153 | SAADL | no |  |
| 77 | 154 | SAADR | no |  |
| 78 | 155 | SAAVL | no |  |
| 79 | 156 | SAAVR | no |  |
| 80 | 181 | PVCL | no |  |
| 81 | 182 | PVCR | no |  |
| 82 | 193 | RMDDL | no | output |
| 83 | 194 | RMDDR | no | output |
| 84 | 195 | RMDL | no | output |
| 85 | 196 | RMDR | no | output |
| 86 | 197 | RMDVL | no | output |
| 87 | 198 | RMDVR | no | output |
| 88 | 210 | SMBDL | no | output |
| 89 | 211 | SMBDR | no | output |
| 90 | 212 | SMBVL | no | output |
| 91 | 213 | SMBVR | no | output |
| 92 | 223 | DA2 | no | output |
| 93 | 224 | DA3 | no | output |
| 94 | 225 | DA4 | no | output |
| 95 | 226 | DA5 | no | output |
| 96 | 227 | DA6 | no | output |
| 97 | 229 | DA8 | no | output |
| 98 | 234 | DB3 | no | output |
| 99 | 235 | DB4 | no | output |
| 100 | 236 | DB5 | no | output |
| 101 | 237 | DB6 | no | output |
| 102 | 251 | DD1 | no | output |
| 103 | 252 | DD2 | no | output |
| 104 | 253 | DD3 | no | output |
| 105 | 254 | DD4 | no | output |
| 106 | 255 | DD5 | no | output |
| 107 | 256 | DD6 | no | output |
| 108 | 258 | VA2 | no | output |
| 109 | 259 | VA3 | no | output |
| 110 | 260 | VA4 | no | output |
| 111 | 261 | VA5 | no | output |
| 112 | 262 | VA6 | no | output |
| 113 | 263 | VA7 | no | output |
| 114 | 264 | VA8 | no | output |
| 115 | 265 | VA9 | no | output |
| 116 | 266 | VA10 | no | output |
| 117 | 271 | VB3 | no | output |
| 118 | 272 | VB4 | no | output |
| 119 | 273 | VB5 | no | output |
| 120 | 274 | VB6 | no | output |
| 121 | 275 | VB7 | no | output |
| 122 | 276 | VB8 | no | output |
| 123 | 277 | VB9 | no | output |
| 124 | 278 | VB10 | no | output |
| 125 | 280 | VD1 | no | output |
| 126 | 281 | VD2 | no | output |
| 127 | 282 | VD3 | no | output |
| 128 | 283 | VD4 | no | output |
| 129 | 284 | VD5 | no | output |
| 130 | 285 | VD6 | no | output |
| 131 | 286 | VD7 | no | output |
| 132 | 287 | VD8 | no | output |
| 133 | 288 | VD9 | no | output |
| 134 | 289 | VD10 | no | output |
| 135 | 290 | VD11 | no | output |
| 136 | 291 | VD12 | no | output |


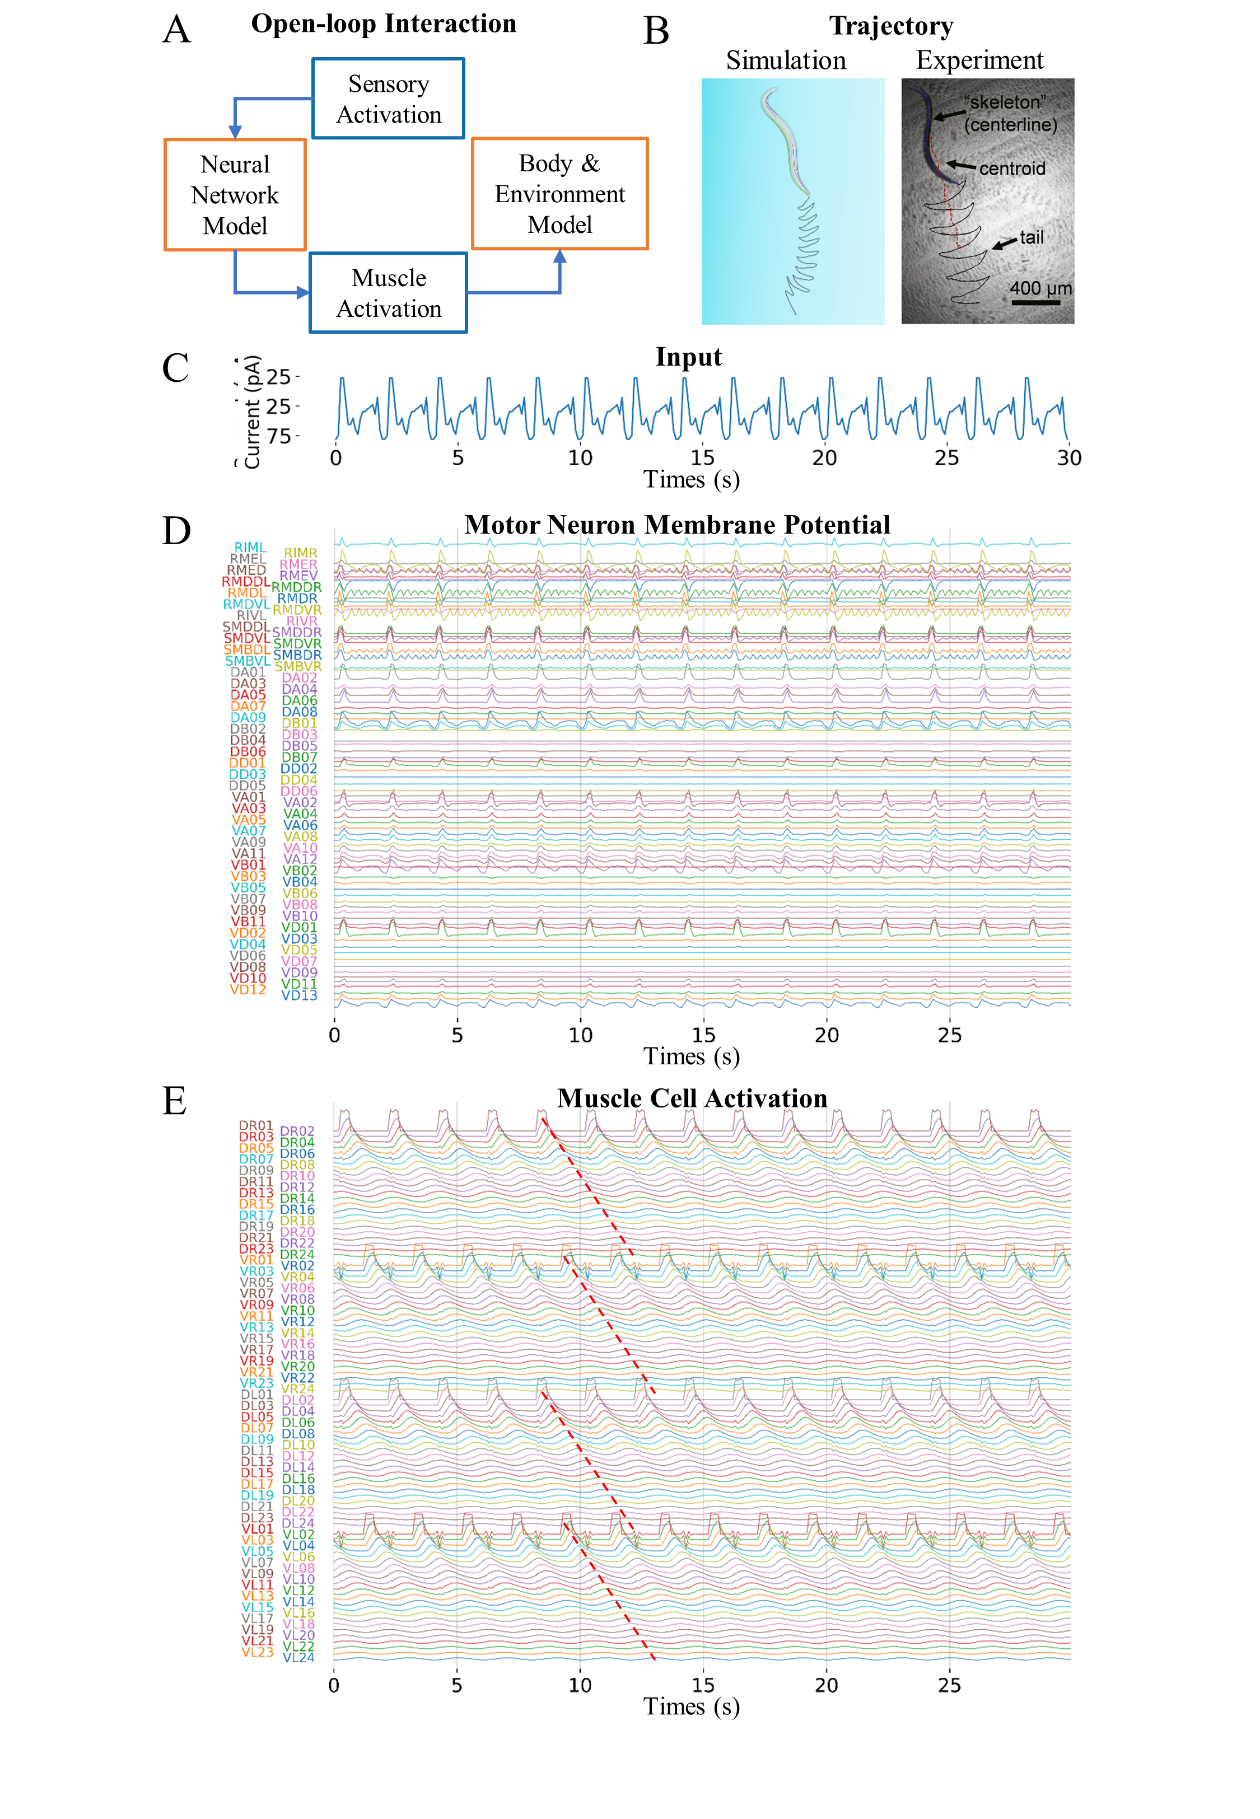


**Figure S1.** **The open-loop 3D simulation of C. elegans locomotion behavior.**

**A.** The information flow diagram of the open-loop interaction between neural network model and body & environment model. **B.** Comparison of *C. elegans* trajectory during forward locomotion in simulation (left) and experiment (right, from a published article4). **C.** Input current injected to sensory neurons during locomotion. **D.** Left, neural network model of *C. elegans*. Right, membrane potentials of all motor neurons in the model during locomotion. **E.** Left, the body model with 96 muscle cells. Right, the activation signals of all muscle cells during locomotion. The dashed red line indicates that the activation signal shifting from head to tail.

**Movie S1.** Closed-loop 3D simulation of *C. elegans* locomotion behavior.

**Movie S2.** Closed-loop 3D simulation of six *C. elegans* locomotion behavior.

**Movie S3.** Open-loop 3D simulation of *C. elegans* locomotion behavior.

**References**

1 Palyanov, A. Y. & Khayrulin, S. S. Sibernetic: A software complex based on the PCI SPH algorithm aimed at simulation problems in biomechanics. *Russian Journal of Genetics: Applied Research* **5**, 635-641, doi:10.1134/S2079059715060052 (2015).

2 Palyanov, A., Khayrulin, S. & Larson, S. D. Three-dimensional simulation of the Caenorhabditis elegans body and muscle cells in liquid and gel environments for behavioural analysis. *Philosophical Transactions of the Royal Society B: Biological Sciences* **373**, 20170376 (2018).

3 Uzel, K., Kato, S. & Zimmer, M. A set of hub neurons and non-local connectivity features support global brain dynamics in C. elegans. *Current Biology* **32**, 3443-3459, doi:<https://doi.org/10.1016/j.cub.2022.06.039> (2022).

4 Sznitman, J., Purohit, P. K., Krajacic, P., Lamitina, T. & Arratia, P. E. Material Properties of <em>Caenorhabditis elegans</em> Swimming at Low Reynolds Number. *Biophysical Journal* **98**, 617-626, doi:10.1016/j.bpj.2009.11.010 (2010).
